# Supplementary material for: Lipidomic Analysis of the Outer Membrane Vesicles from Paired Polymyxin-Susceptible and -Resistant Klebsiella pneumoniae Clinical Isolates
Source: MDPI journal article supplement (doi:10.3390/ijms19082356), 2018-08-10
Supplement: s1 [file s1]

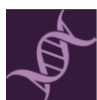

Article

# Lipidomic Analysis of the Outer Membrane Vesicles from Paired Polymyxin-Susceptible and -Resistant *Klebsiella pneumoniae* Clinical Isolates

Raad Jasim <sup>1</sup>, Mei-Ling Han <sup>2</sup>, Yan Zhu <sup>2</sup>, Xiaohan Hu <sup>3</sup>, Maytham H. Hussein <sup>3</sup>, Yu-Wei Lin <sup>2</sup>, Qi (Tony) Zhou <sup>4</sup>, Charlie Yao Da Dong <sup>1</sup>, Jian Li <sup>2,\*</sup> and Tony Velkov <sup>3,\*</sup>

<sup>1</sup> Drug Delivery, Disposition and Dynamics, Monash Institute of Pharmaceutical Sciences, Monash University, Parkville, 3052 Victoria, Australia; raad.jasim@monash.edu (R.J.); charlie.dong@monash.edu (C.Y.D.D.)

<sup>2</sup> Monash Biomedicine Discovery Institute, Immunity and Infection Program and Department of Microbiology, Monash University, 3800 VIC, Australia; meiling.han@monash.edu (M.H.); yan.zhu@monash.edu (Y.Z); Jian.Li@monash.edu (J.L)

<sup>3</sup> Department of Pharmacology and Therapeutics, University of Melbourne, Parkville, 3010 Victoria, Australia; xiaohan2@student.unimelb.edu.au (X.H); maytham.hussein@unimelb.edu.au (M.H.H); tony.velkov@monash.edu (T.V.)

<sup>4</sup> Department of Industrial and Physical Pharmacy, College of Pharmacy, Purdue University, 575 Stadium Mall Drive, West Lafayette, 47907 IN, USA; tonyzhou@purdue.edu

\* Correspondence: colistin.polymyxin@gmail.com (J.L); Tony.Velkov@unimelb.edu.au (T.V)

Received: 29 July 2018; Accepted: 7 Aug 2018; Published: date

## Supplementary Materials:

**Table S1.** Antibiotic susceptibility and resistance gene profiles for two *K. pneumoniae* clinical isolates.

| Isolate name                 |                               | <i>K.pneumoniae</i><br>FADDI-KP069 |           | <i>K. pneumoniae</i><br>BM3 |
|------------------------------|-------------------------------|------------------------------------|-----------|-----------------------------|
| Antibiotic<br>susceptibility | Ampicillin                    | Susceptibility                     | MIC Value | Susceptibility              |
|                              |                               | R                                  | ≥ 32      | ND                          |
|                              | Amoxicillin/Clavulanic Acid   | R                                  | ≥ 32      | ND                          |
|                              | Ticarcillin/Clavulanic Acid   | R                                  | ≥ 128     | ND                          |
|                              | Piperacillin/Tazobactam       | R                                  | ≥ 128     | ND                          |
|                              | Cefazolin                     | R                                  | ≥ 64      | ND                          |
|                              | Cefoxitin                     | R                                  | ≥ 64      | ND                          |
|                              | Ceftazidime                   | R                                  | ≥ 64      | ND                          |
|                              | Ceftriaxone                   | R                                  | ≥ 64      | ND                          |
|                              | Cefepime                      | R                                  | 8         | ND                          |
|                              | Meropenem                     | R                                  | ≥ 16      | ND                          |
|                              | Amikacin                      | R                                  | ≥ 64      | I                           |
|                              | Gentamicin                    | R                                  | ≥ 16      | R                           |
|                              | Tobramycin                    | R                                  | ≥ 16      | ND                          |
|                              | Ciprofloxacin                 | R                                  | ≥ 4       | R                           |
|                              | Norfloxacin                   | R                                  | ≥ 16      | ND                          |
|                              | Nitrofurantoin                | R                                  | 256       | S                           |
|                              | Trimethoprim                  | R                                  | ≥ 16      | ND                          |
|                              | Trimethoprim/Sulfamethoxazole | R                                  | ≥ 320     | ND                          |
|                              | Tetracyclin                   | ND                                 | ND        | R                           |
|                              | Chloramphenicol               | ND                                 | ND        | S                           |
|                              | Netilmicin                    | ND                                 | ND        | I                           |
|                              | Tigecycline                   | ND                                 | ND        | I                           |
|                              | Fosfomycin                    | ND                                 | ND        | S                           |

|                  |                                |    |    |    |
|------------------|--------------------------------|----|----|----|
|                  | Aztreonam                      | ND | ND | R  |
|                  | ESBL                           | +  |    | ND |
|                  | Carbapenemase (metallo or KPC) | +  |    | ND |
| Resistance genes | NDM-1                          | ND |    | +  |
|                  | CTX-M                          | ND |    | +  |
|                  | CMY-2                          | ND |    | –  |
|                  | SHV                            | ND |    | +  |
|                  | TEM                            | ND |    | +  |
|                  | AAC-6'-1B                      | +  |    | +  |

R = Resistant; I = Intermediate; S = Susceptible.
